# Supplementary material for: Feasibility analysis of metabolic parameters based on baseline 18 F-FDG PET/CT to predict heterogeneity and recurrence of diffuse large B-cell lymphoma
Source: Research Square preprint supplement (doi:10.21203/rs.3.rs-6070367/v1), 2025-04-21
Supplement: Supplementary file 1 [file 8ae2d32b20ceb6f14debdbf2.docx]

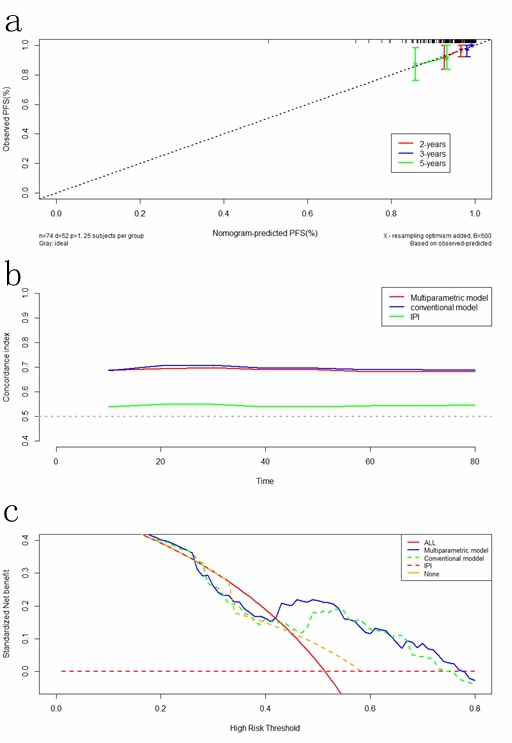


**Supplementary Fig1.** (a.) Calibration curves of the model for predicting PFS in the validation cohort. (b.) The time-dependent area under the ROC curve of the models for predicting PFS in the validation cohort. (c.) Decision curve analysis of the models for predicting PFS in the validation cohort.


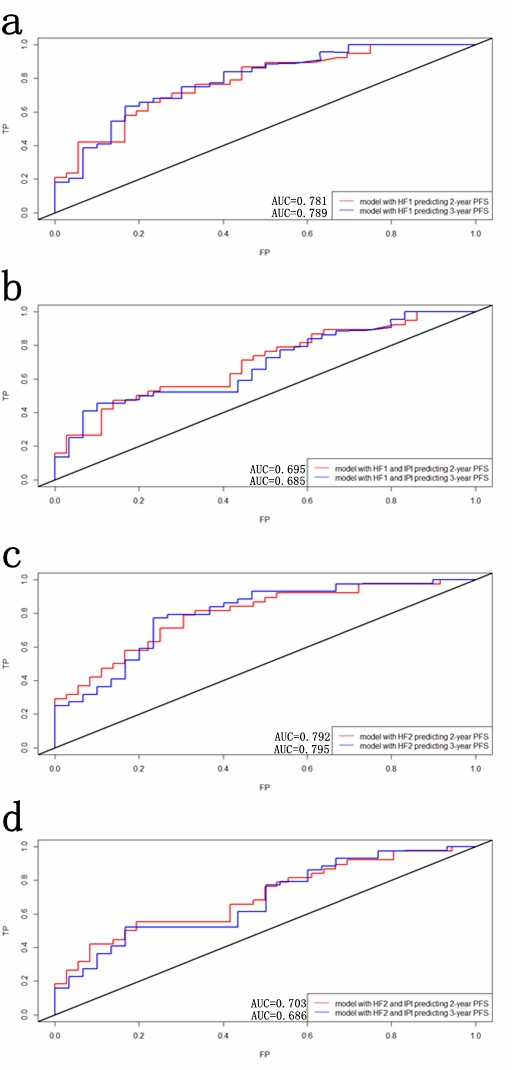


**Supplementary Fig2.** (a.) The ROC curve of HF1 for predicting 2-PFS and 3-PFS in the validation cohort. (b.) The ROC curve of HF1 and IPI for predicting 2-PFS and 3-PFS in the validation cohort. (c.) The ROC curve of HF2 for predicting 2-PFS and 3-PFS in the validation cohort. (d.) The ROC curve of HF2 and IPI for predicting 2-PFS and 3-PFS in the validation cohort.
